# Supplementary material for: High‐Intensity Interval Training versus Moderate‐Intensity Continuous Training on Health Outcomes for Children and Adolescents: A Meta‐analysis of Randomized Controlled Trials
Source: Hindawi journal article supplement (doi:10.1155/2020/9797439), 2020-01-01
Supplement: f1 [file 9797439.f1.zip]

Archive with 3 entries (3 files):
- Supplemental 1.docx
- Supplemental 2.docx
- Supplemental 3.docx
