# Supplementary material for: High‐Intensity Interval Training versus Moderate‐Intensity Continuous Training on Health Outcomes for Children and Adolescents: A Meta‐analysis of Randomized Controlled Trials
Source: Hindawi journal article supplement (doi:10.1155/2020/9797439), 2020-01-01
Supplement: f1 [file 9797439.f1.zip › Supplemental 2.docx]

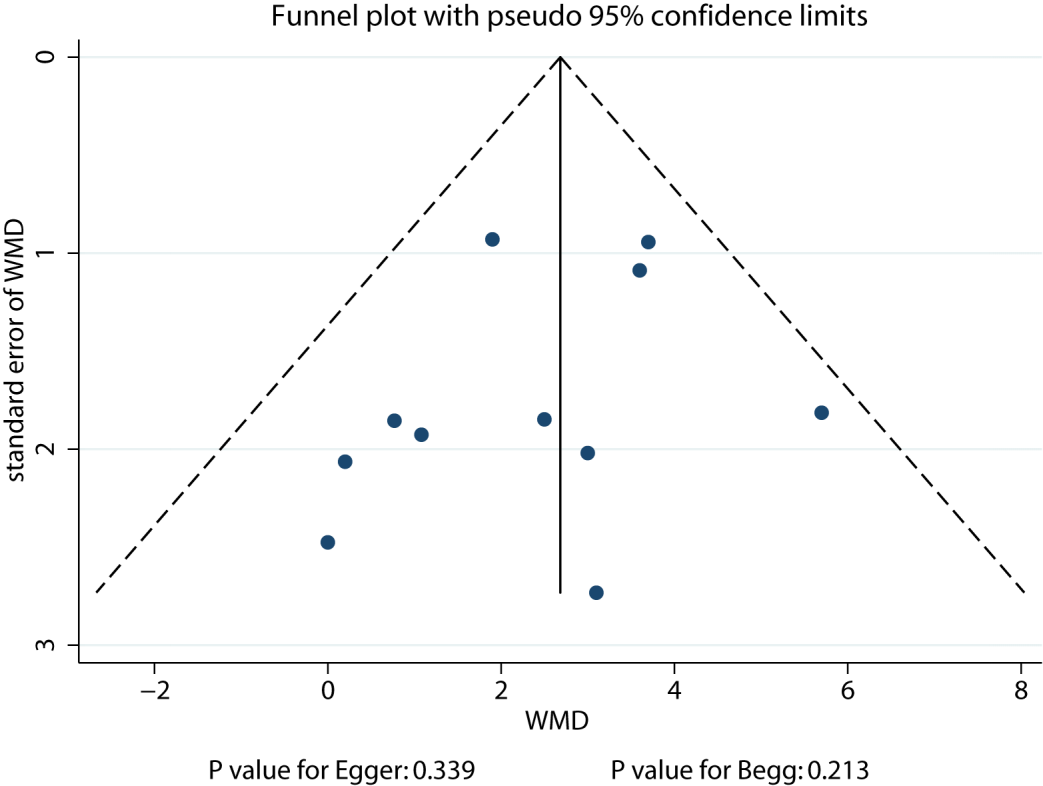


Figure S1. Funnel plot of high-intensity interval training versus moderate-intensity continuous training on peak oxygen uptake (VO2)


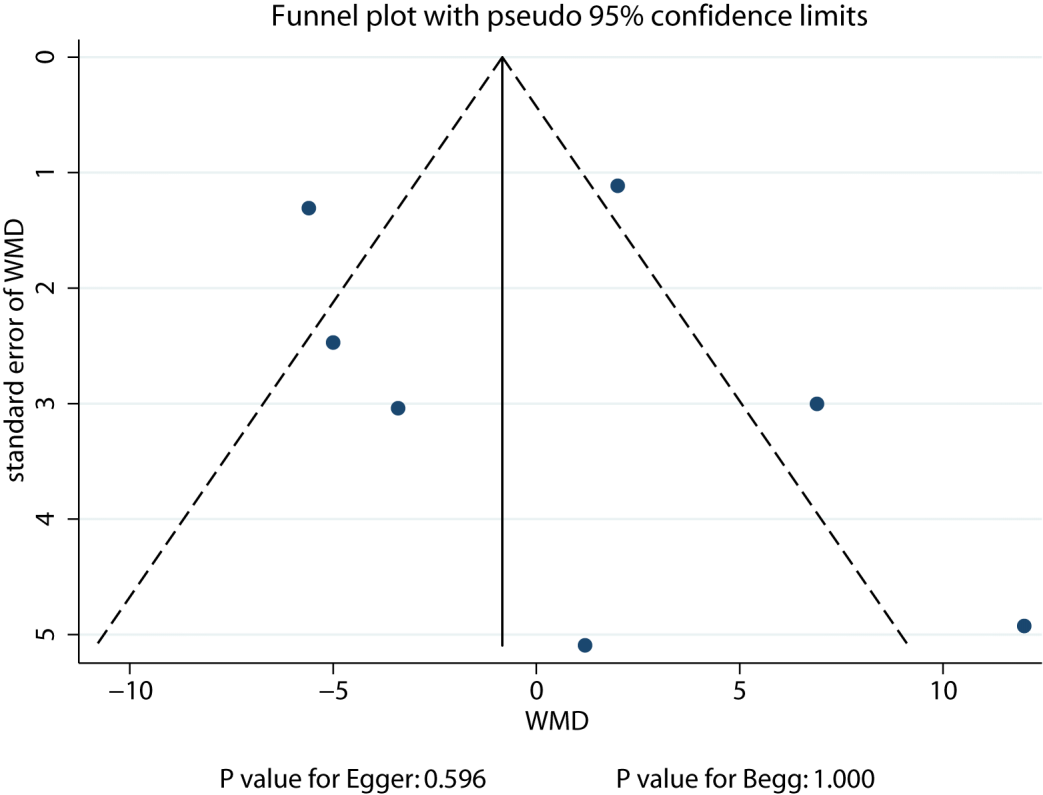


Figure S2. Funnel plot of high-intensity interval training versus moderate-intensity continuous training on peak heart rate


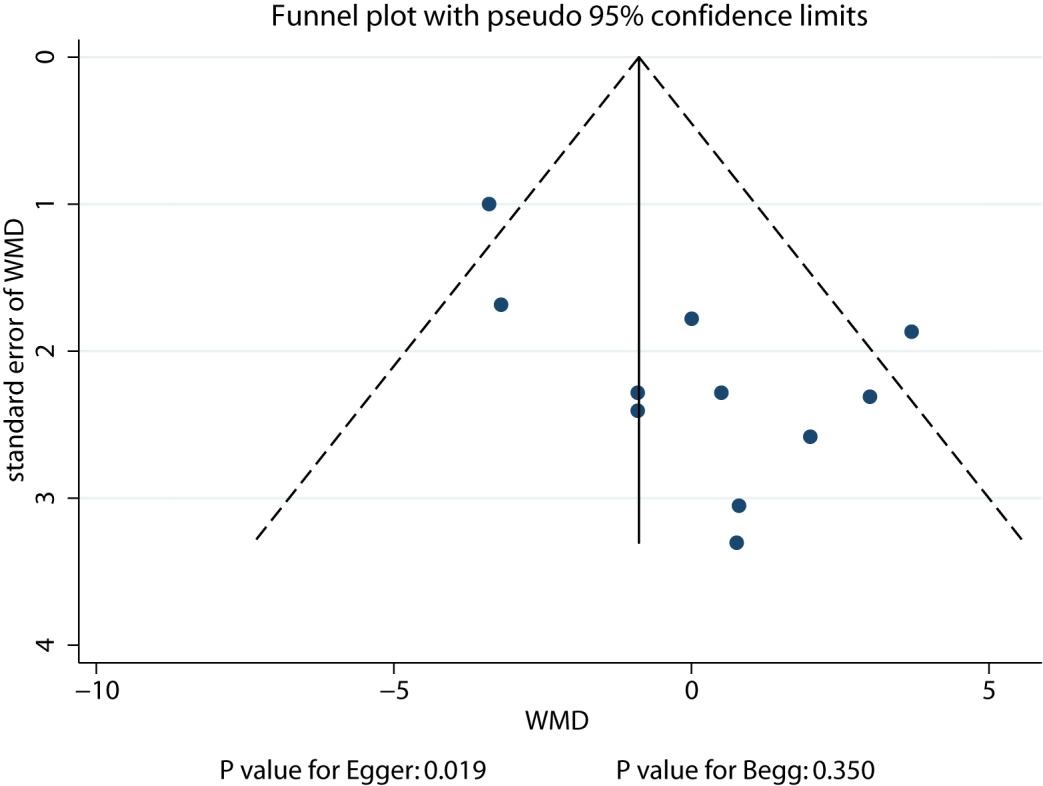


Figure S3. Funnel plot of high-intensity interval training versus moderate-intensity continuous training on fat mass


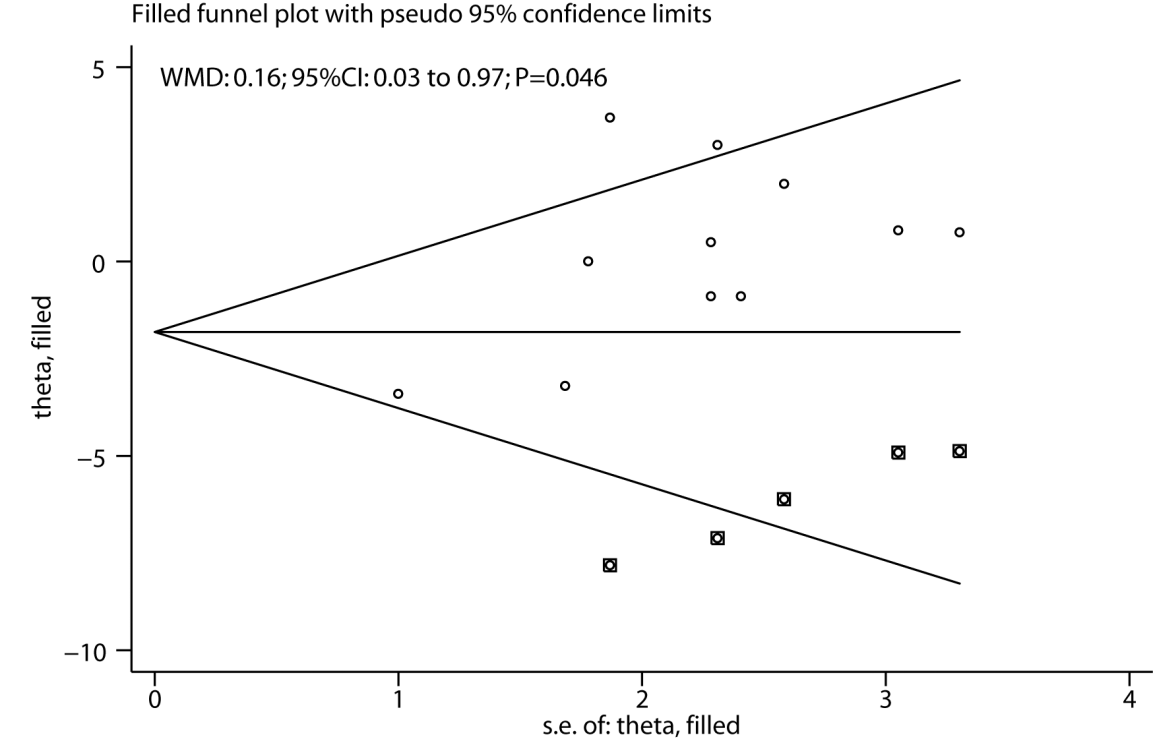


Figure S4. Results of Trim and fill method for high-intensity interval training versus moderate-intensity continuous training on fat mass


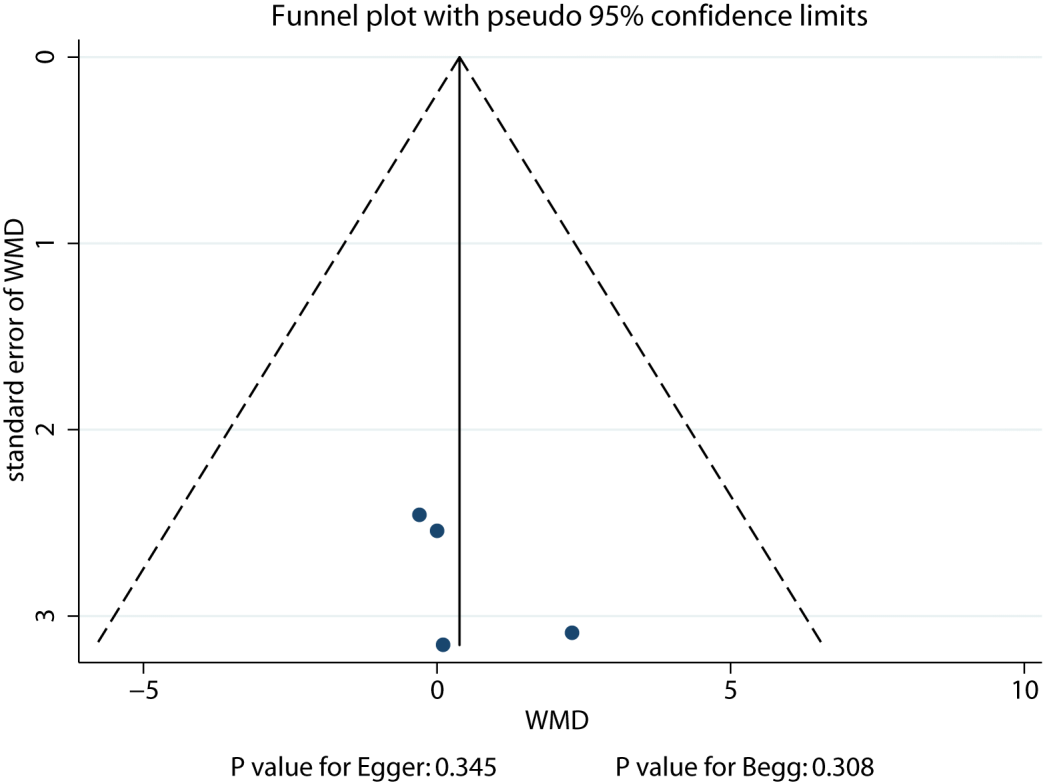


Figure S5. Funnel plot of high-intensity interval training versus moderate-intensity continuous training on free fat mass


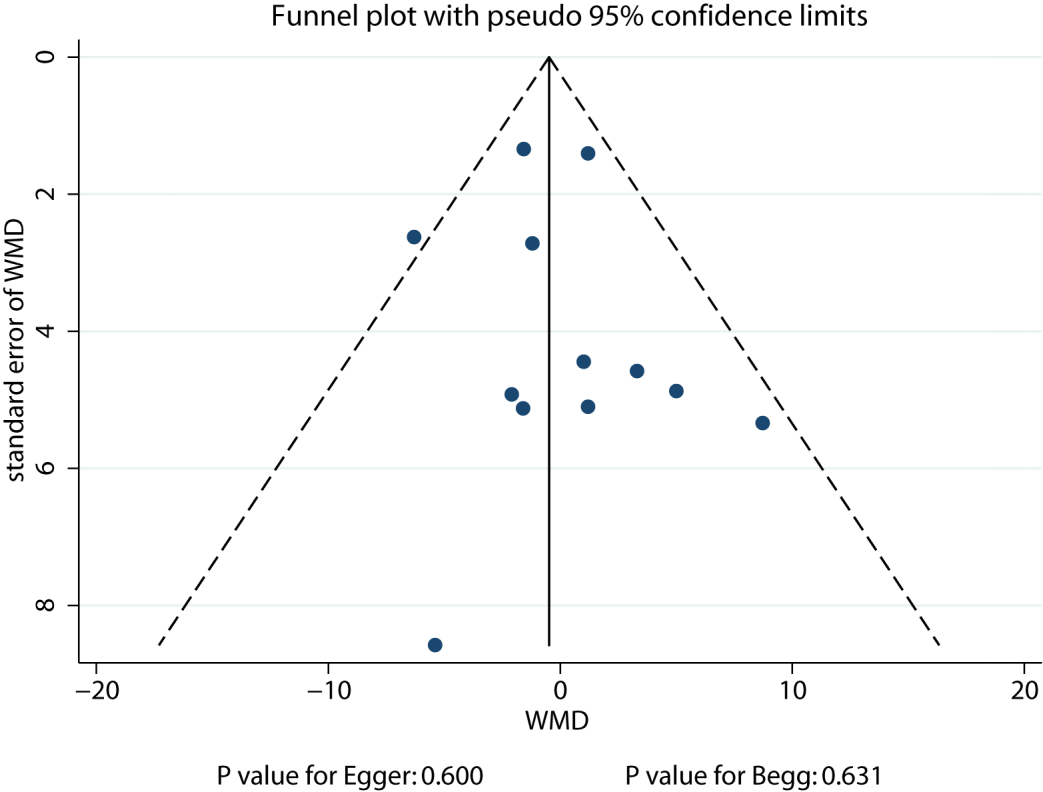


Figure S6. Funnel plot of high-intensity interval training versus moderate-intensity continuous training on weight


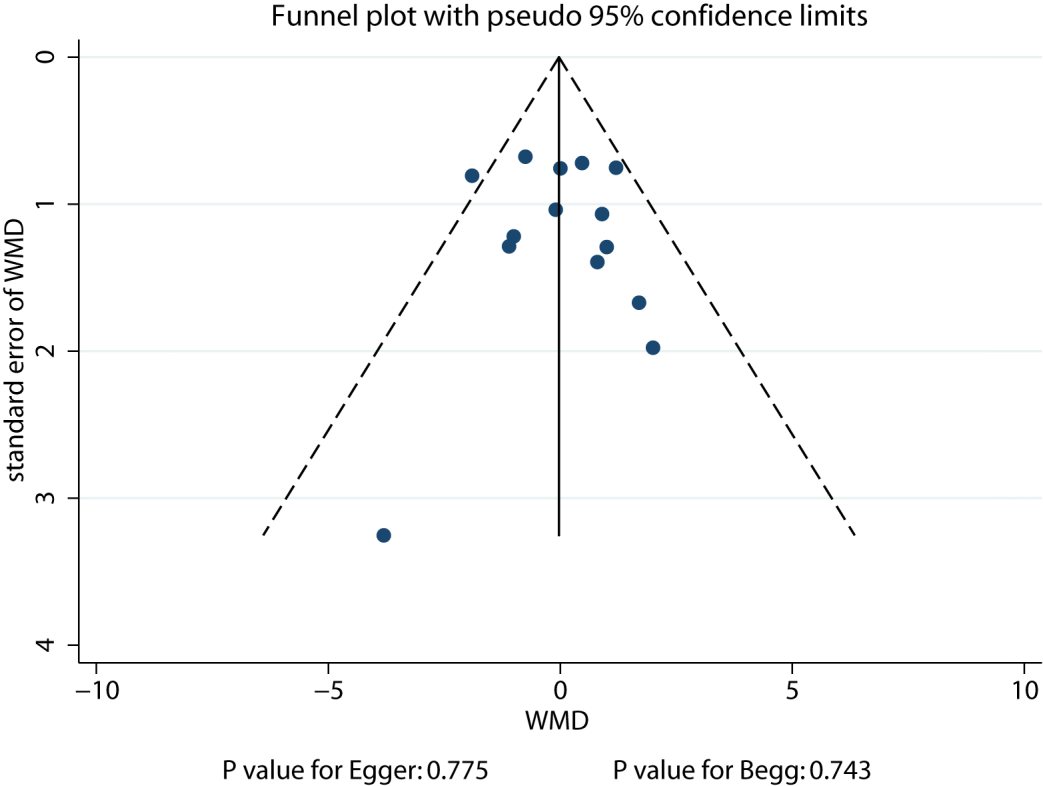


Figure S7. Funnel plot of high-intensity interval training versus moderate-intensity continuous training on body mass index


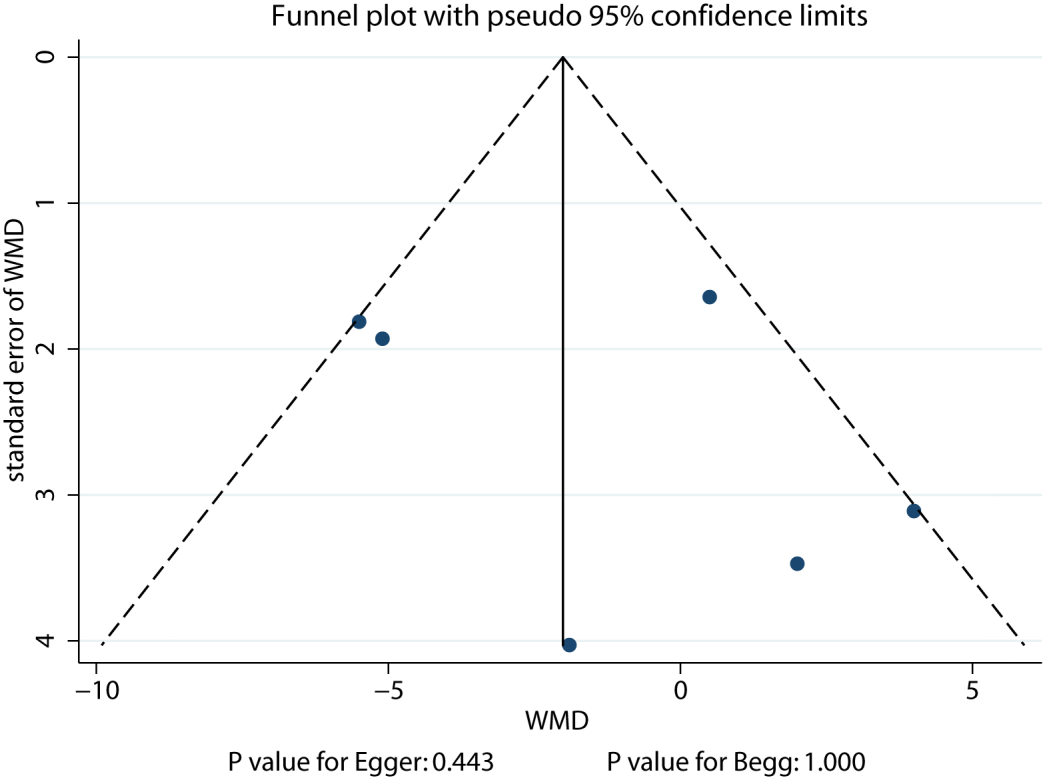


Figure S8. Funnel plot of high-intensity interval training versus moderate-intensity continuous training on waist circumference


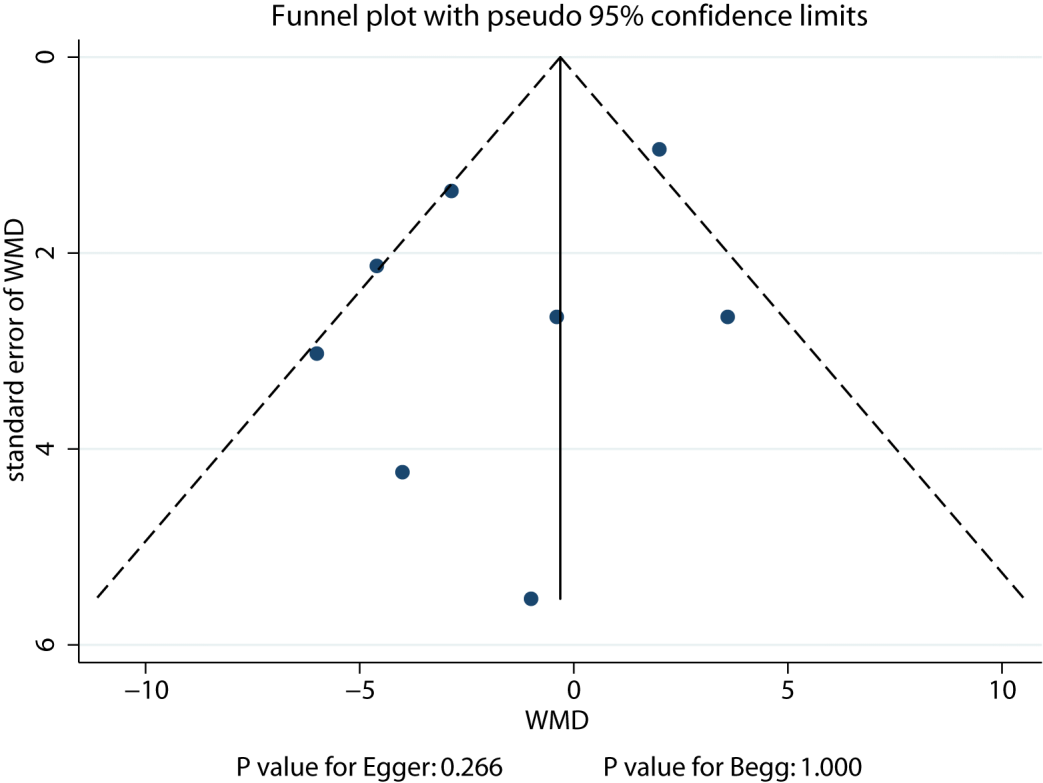


Figure S9. Funnel plot of high-intensity interval training versus moderate-intensity continuous training on systolic blood pressure


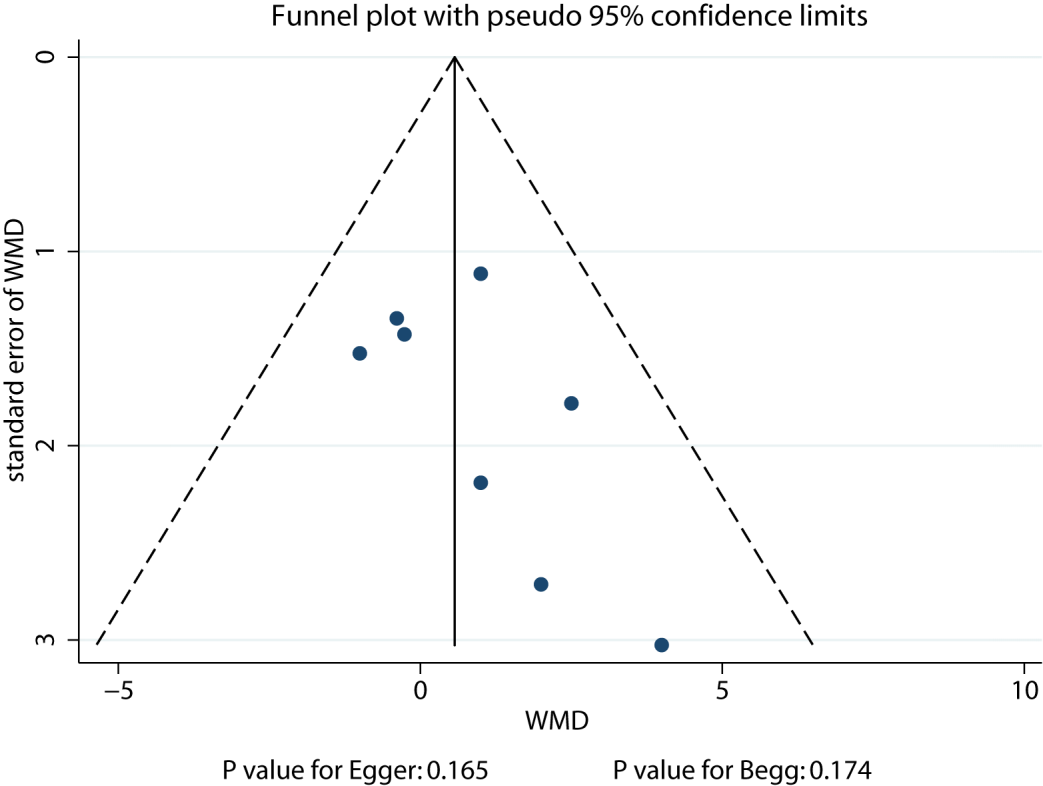


Figure S10. Funnel plot of high-intensity interval training versus moderate-intensity continuous training on diastolic blood pressure


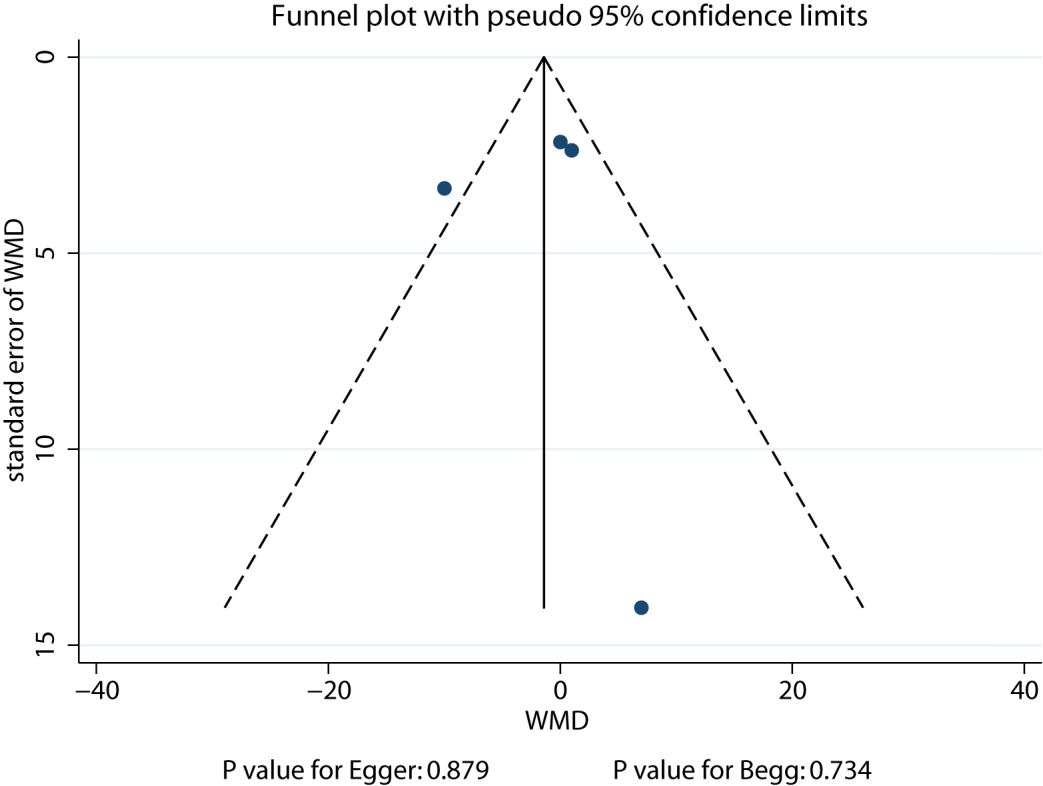


Figure S11. Funnel plot of high-intensity interval training versus moderate-intensity continuous training on glycemia


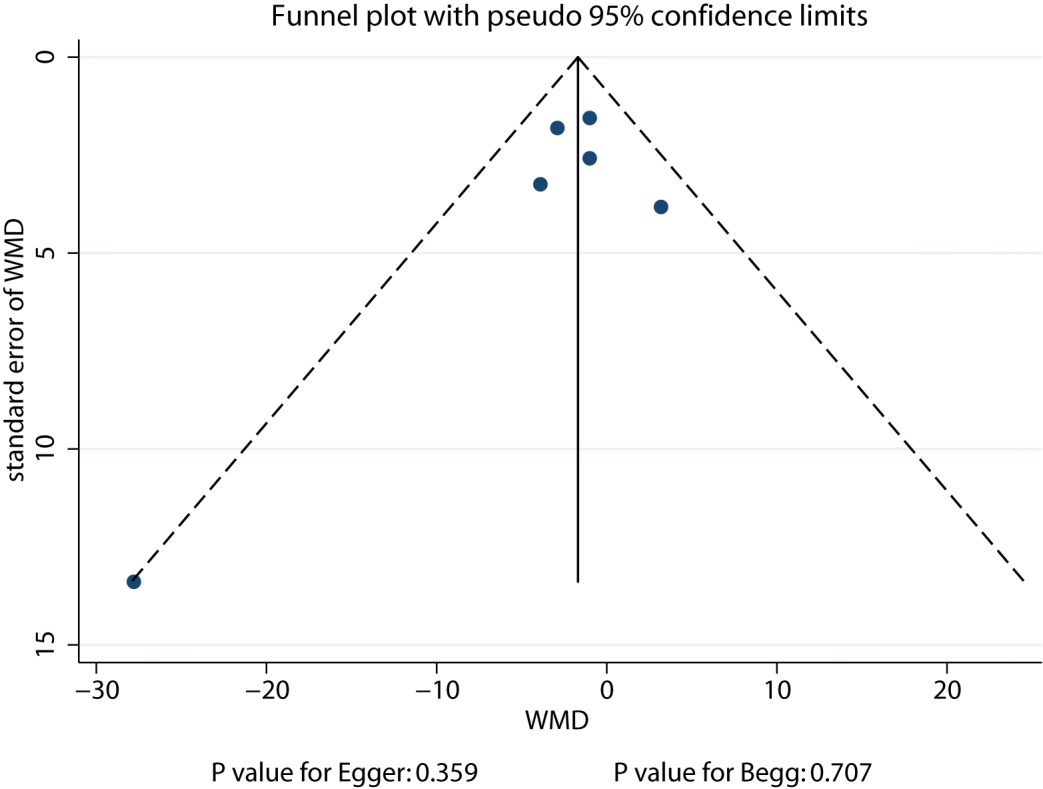


Figure S12. Funnel plot of high-intensity interval training versus moderate-intensity continuous training on insulinemia


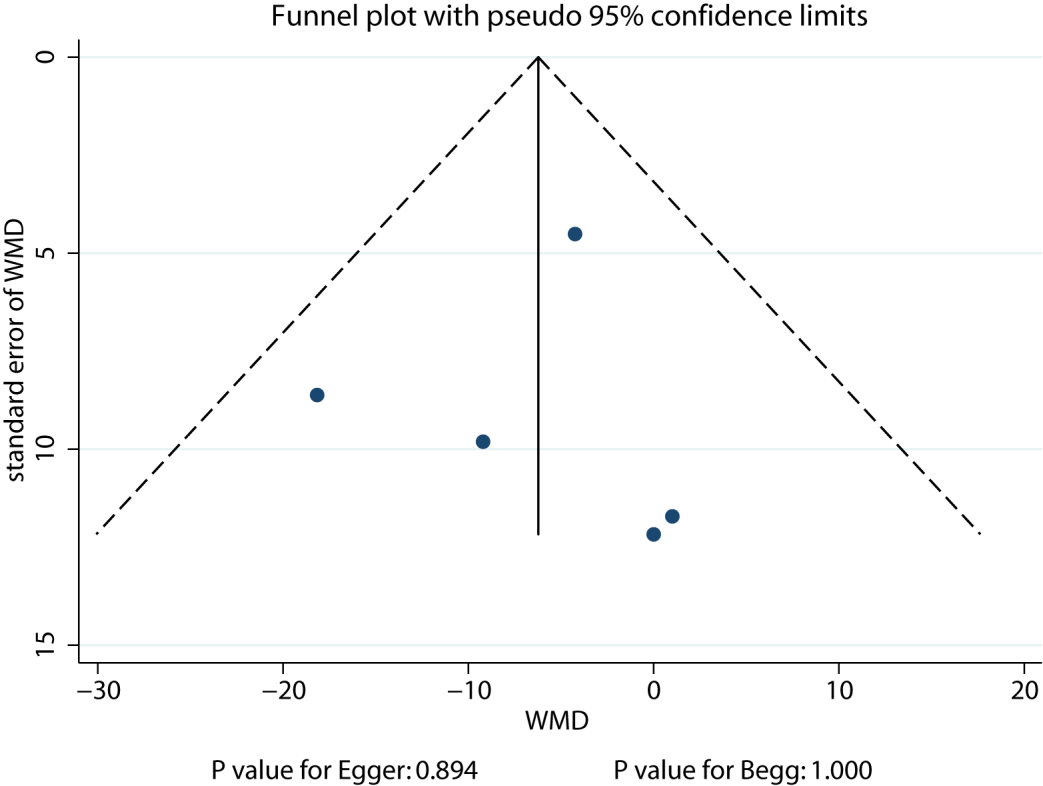


Figure S13. Funnel plot of high-intensity interval training versus moderate-intensity continuous training on total cholesterol


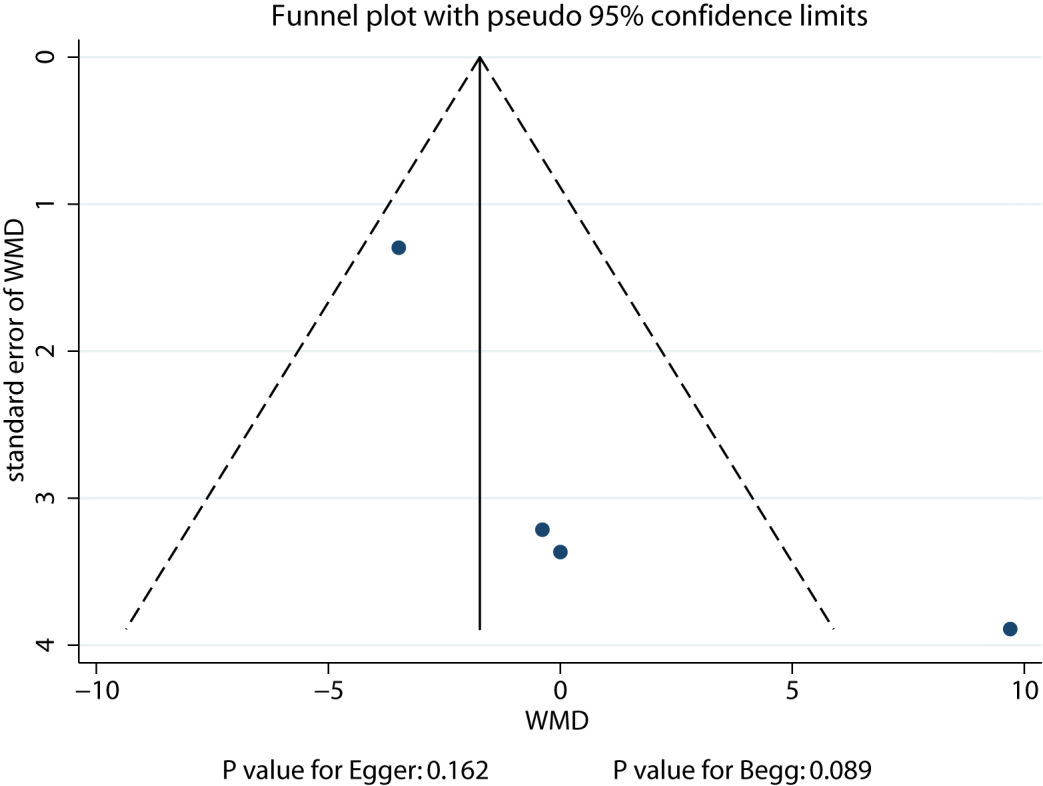


Figure S14. Funnel plot of high-intensity interval training versus moderate-intensity continuous training on high density lipoprotein


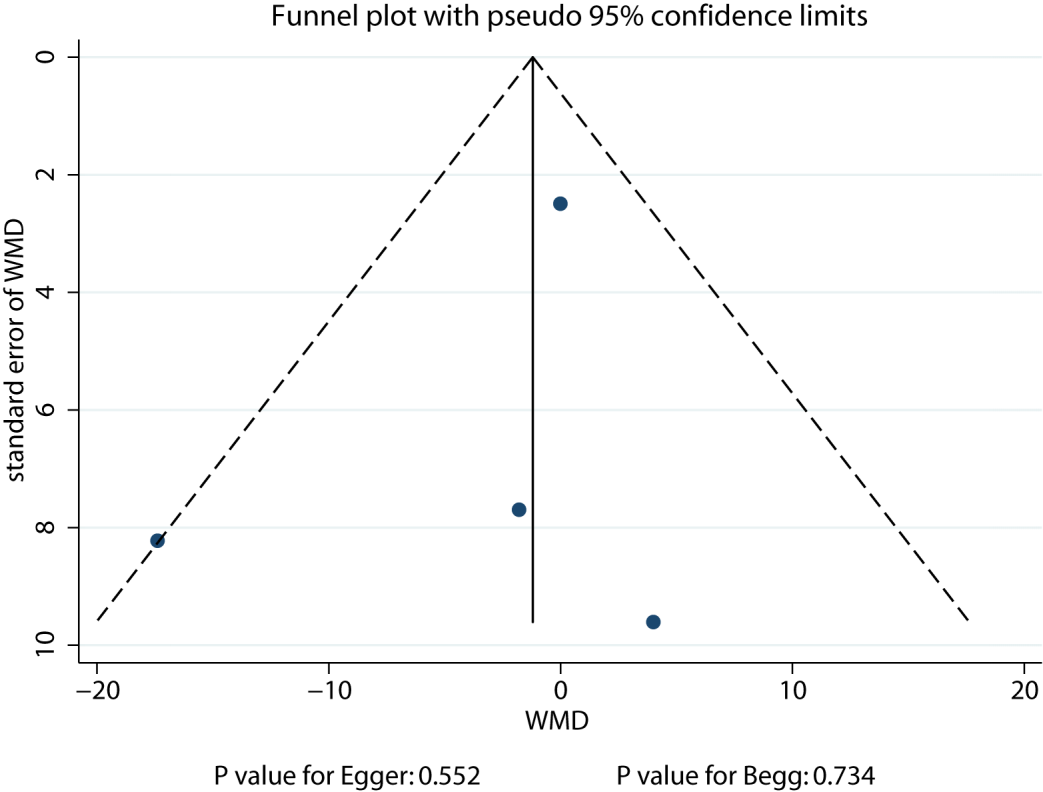


Figure S15. Funnel plot of high-intensity interval training versus moderate-intensity continuous training on low density lipoprotein


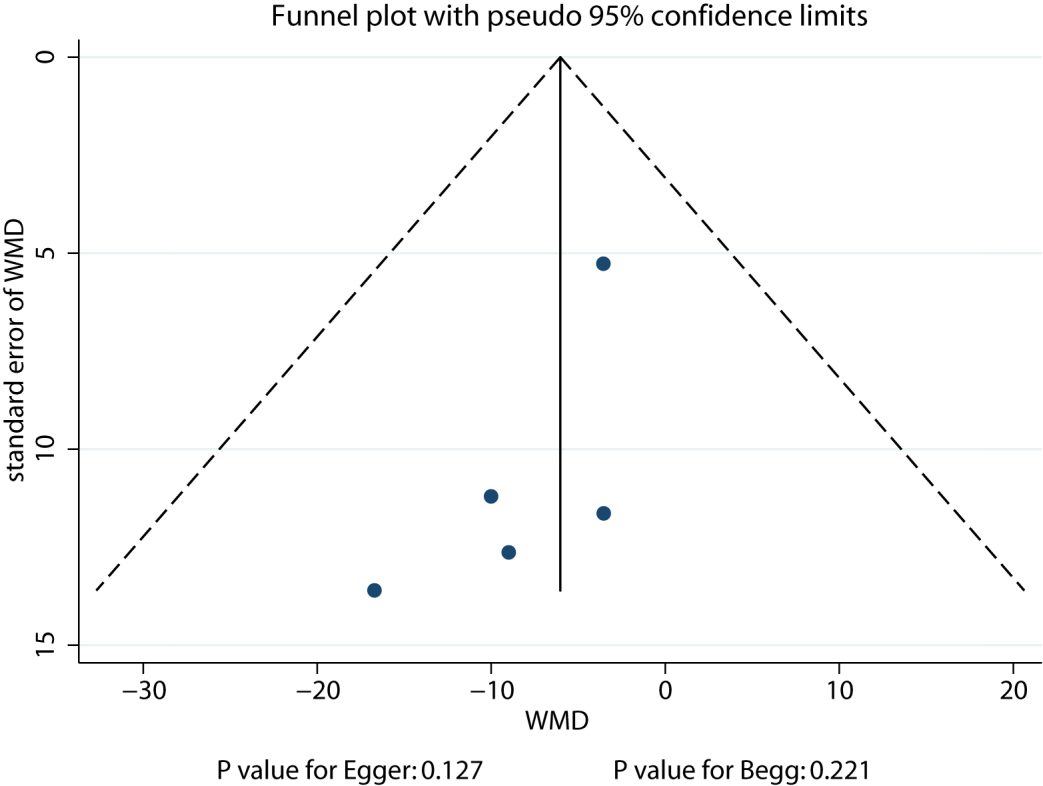


Figure S16. Funnel plot of high-intensity interval training versus moderate-intensity continuous training on triglycerides


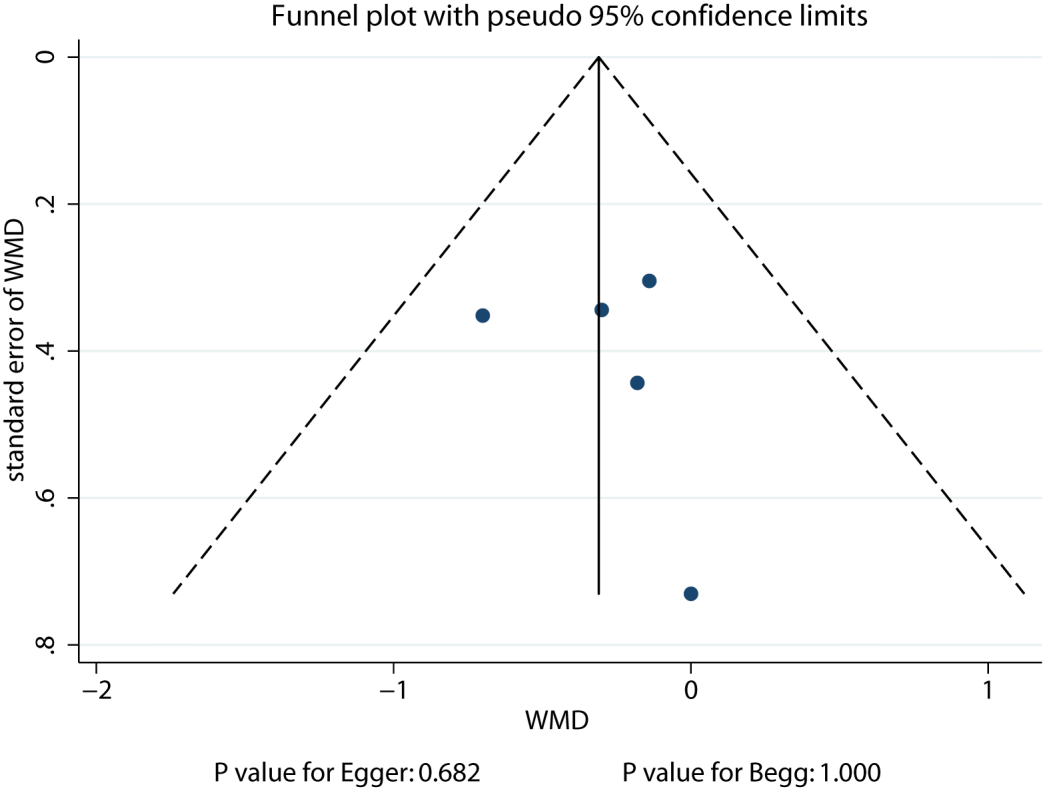


Figure S17. Funnel plot of high-intensity interval training versus moderate-intensity continuous training on HOMA-IR


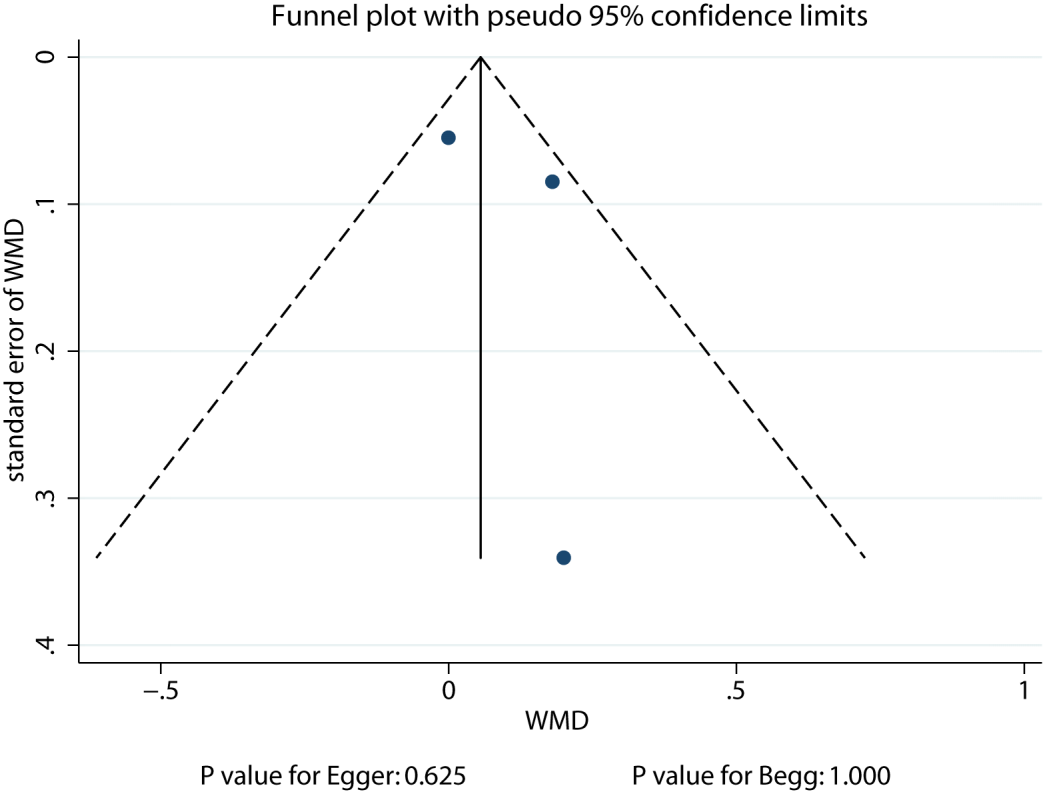


Figure S18. Funnel plot of high-intensity interval training versus moderate-intensity continuous training on HbA1c


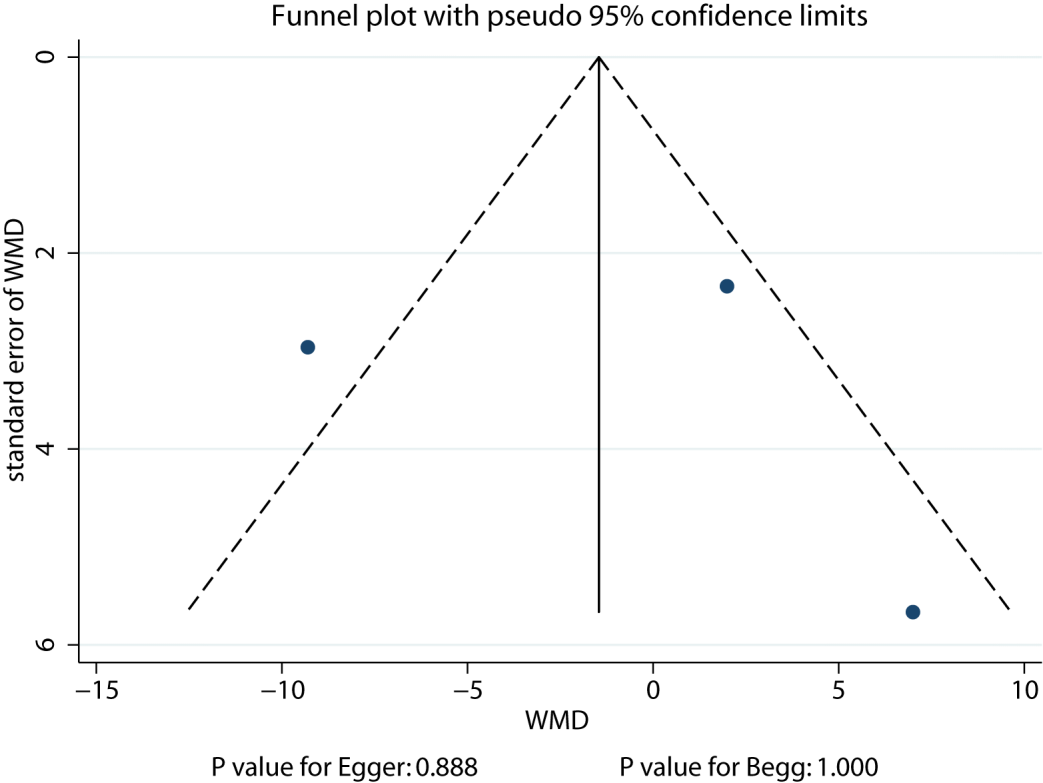


Figure S19. Funnel plot of high-intensity interval training versus moderate-intensity continuous training on leptinemia
