# Supplementary material for: High‐Intensity Interval Training versus Moderate‐Intensity Continuous Training on Health Outcomes for Children and Adolescents: A Meta‐analysis of Randomized Controlled Trials
Source: Hindawi journal article supplement (doi:10.1155/2020/9797439), 2020-01-01
Supplement: f1 [file 9797439.f1.zip › Supplemental 3.docx]

Table S1. Sensitivity analysis of high-intensity interval training versus moderate-intensity continuous training on peak VO2

| Excluding studies | WMD and 95% CI | P value | I2(%) |
| --- | --- | --- | --- |
| McManus 2005 | 2.77 (1.89 to 3.66) | < 0.001 | 0.0 |
| Koubaa 2013 | 2.39 (1.40 to 3.38) | < 0.001 | 0.0 |
| Boer 2014 | 2.80 (1.91 to 3.70) | < 0.001 | 0.0 |
| Farah 2014 | 2.50 (1.54 to 3.45) | < 0.001 | 0.0 |
| Starkoff 2014 | 2.65 (1.70 to 3.59) | < 0.001 | 7.8 |
| Murphy 2015 | 2.67 (1.71 to 3.63) | < 0.001 | 7.9 |
| Kargarfard 2016 | 2.80 (1.90 to 3.70) | < 0.001 | 0.0 |
| Kargarfard 2016 | 2.77 (1.87 to 3.67) | < 0.001 | 0.6 |
| Martínez 2016 | 2.92 (1.92 to 3.91) | < 0.001 | 0.0 |
| Dias 2018 | 2.64 (1.69 to 3.59) | < 0.001 | 7.8 |
| van Biljon 2018 | 2.49 (1.59 to 3.39) | < 0.001 | 0.0 |

Table S2. Sensitivity analysis of high-intensity interval training versus moderate-intensity continuous training on peak heart rate

| Excluding studies | WMD and 95% CI | P value | I2(%) |
| --- | --- | --- | --- |
| McManus 2005 | 1.39 (-3.41 to 6.20) | 0.570 | 85.2 |
| Koubaa 2013 | 0.13 (-5.02 to 5.29) | 0.960 | 80.4 |
| Boer 2014 | 0.30 (-4.29 to 4.88) | 0.899 | 86.4 |
| van Biljon 2018 | 1.04 (-3.76 to 5.84) | 0.672 | 86.2 |
| Morrissey 2018 | -0.79 (-5.20 to 3.61) | 0.725 | 83.2 |
| Cvetković 2018 | 1.57 (-2.62 to 5.77) | 0.462 | 71.4 |
| Nugent 2019 | -0.93 (-5.11 to 3.24) | 0.661 | 83.3 |

Table S3. Sensitivity analysis of high-intensity interval training versus moderate-intensity continuous training on fat mass

| Excluding studies | WMD and 95% CI | P value | I2(%) |
| --- | --- | --- | --- |
| Corte de Araujo 2012 | -0.31 (-2.09 to 1.47) | 0.733 | 50.5 |
| Koubaa 2013 | -0.47 (-2.18 to 1.24) | 0.590 | 45.4 |
| Boer 2014 | -0.04 (-1.89 to 1.81) | 0.965 | 53.9 |
| Farah 2014 | 0.38 (-1.07 to 1.84) | 0.606 | 10.3 |
| Murphy 2015 | 0.25 (-1.57 to 2.07) | 0.786 | 48.2 |
| Lee 2015 | -0.81 (-2.34 to 0.71) | 0.297 | 30.0 |
| Martínez 2016 | -0.11 (-2.02 to 1.79) | 0.906 | 53.2 |
| Lazzer 2017 | -0.03 (-1.90 to 1.83) | 0.971 | 53.9 |
| Dias 2018 | -0.18 (-1.99 to 1.62) | 0.844 | 53.1 |
| Morrissey 2018 | -0.17 (-2.02 to 1.67) | 0.853 | 52.9 |
| Cvetković 2018 | -0.17 (-1.97 to 1.63) | 0.851 | 53.2 |

Table S4. Sensitivity analysis of high-intensity interval training versus moderate-intensity continuous training on free fat mass

| Excluding studies | WMD and 95% CI | P value | I2(%) |
| --- | --- | --- | --- |
| Corte de Araujo 2012 | 0.54 (-2.68 to 3.76) | 0.741 | 0.0 |
| Koubaa 2013 | 0.70 (-2.57 to 3.96) | 0.676 | 0.0 |
| Lazzer 2017 | -0.09 (-3.12 to 2.93) | 0.951 | 0.0 |
| Dias 2018 | 0.45 (-2.56 to 3.46) | 0.769 | 0.0 |

Table S5. Sensitivity analysis of high-intensity interval training versus moderate-intensity continuous training on weight

| Excluding studies | WMD and 95% CI | P value | I2(%) |
| --- | --- | --- | --- |
| Corte de Araujo 2012 | -0.65 (-2.48 to 1.17) | 0.482 | 12.4 |
| Koubaa 2013 | -0.61 (-2.54 to 1.32) | 0.535 | 16.8 |
| Boer 2014 | -0.39 (-2.40 to 1.61) | 0.702 | 21.1 |
| Farah 2014 | 0.08 (-1.52 to 1.68) | 0.924 | 0.0 |
| Lee 2015 | -0.38 (-2.32 to 1.56) | 0.702 | 19.3 |
| Kargarfard 2016 | -1.12 (-3.14 to 0.90) | 0.277 | 6.0 |
| Kargarfard 2016 | -0.04 (-2.32 to 2.23) | 0.971 | 14.6 |
| Lazzer 2017 | -0.50 (-2.49 to 1.50) | 0.626 | 20.7 |
| Dias 2018 | -0.37 (-2.37 to 1.63) | 0.717 | 20.7 |
| van Biljon 2018 | -0.34 (-2.45 to 1.78) | 0.756 | 20.9 |
| Morrissey 2018 | -0.50 (-2.52 to 1.51) | 0.623 | 20.7 |
| Cvetković 2018 | -0.68 (-2.23 to 0.86) | 0.385 | 0.0 |

Table S6. Sensitivity analysis of high-intensity interval training versus moderate-intensity continuous training on body mass index

| Excluding studies | WMD and 95% CI | P value | I2(%) |
| --- | --- | --- | --- |
| Corte de Araujo 2012 | -0.06 (-0.70 to 0.58) | 0.854 | 22.9 |
| Koubaa 2013 | -0.07 (-0.71 to 0.57) | 0.821 | 22.2 |
| Boer 2014 | -0.04 (-0.68 to 0.60) | 0.896 | 24.3 |
| Farah 2014 | 0.20 (-0.35 to 0.76) | 0.475 | 0.0 |
| Murphy 2015 | 0.02 (-0.58 to 0.62) | 0.941 | 19.3 |
| Lee 2015 | -0.06 (-0.67 to 0.56) | 0.858 | 20.8 |
| Kargarfard 2016 | -0.07 (-0.74 to 0.60) | 0.842 | 23.4 |
| Kargarfard 2016 | 0.11 (-0.55 to 0.76) | 0.750 | 19.4 |
| Martínez 2016 | -0.00 (-0.68 to 0.68) | 0.998 | 26.0 |
| Lazzer 2017 | 0.05 (-0.58 to 0.69) | 0.871 | 22.6 |
| Dias 2018 | 0.05 (-0.58 to 0.69) | 0.870 | 22.9 |
| van Biljon 2018 | 0.01 (-0.66 to 0.67) | 0.987 | 26.0 |
| Morrissey 2018 | -0.19 (-0.79 to 0.41) | 0.539 | 8.9 |
| Cvetković 2018 | -0.06 (-0.68 to 0.55) | 0.839 | 20.7 |

Table S7. Sensitivity analysis of high-intensity interval training versus moderate-intensity continuous training on waist circumference

| Excluding studies | WMD and 95% CI | P value | I2(%) |
| --- | --- | --- | --- |
| Corte de Araujo 2012 | -2.41 (-5.54 to 0.73) | 0.133 | 58.2 |
| Koubaa 2013 | -1.95 (-5.44 to 1.54) | 0.274 | 67.3 |
| Boer 2014 | -1.36 (-4.97 to 2.25) | 0.461 | 70.7 |
| Farah 2014 | -0.54 (-4.16 to 3.09) | 0.772 | 61.4 |
| Martínez 2016 | -1.97 (-5.72 to 1.78) | 0.303 | 61.1 |
| van Biljon 2018 | -0.44 (-3.81 to 2.92) | 0.796 | 54.0 |

Table S8. Sensitivity analysis of high-intensity interval training versus moderate-intensity continuous training on systolic blood pressure

| Excluding studies | WMD and 95% CI | P value | I2(%) |
| --- | --- | --- | --- |
| Corte de Araujo 2012 | -1.17 (-3.95 to 1.61) | 0.410 | 68.9 |
| Koubaa 2013 | -2.29 (-4.59 to 0.01) | 0.051 | 29.3 |
| Boer 2014 | -0.79 (-3.44 to 1.86) | 0.558 | 63.3 |
| Kargarfard 2016 | -1.05 (-4.07 to 1.97) | 0.494 | 61.4 |
| Kargarfard 2016 | -0.78 (-3.51 to 1.95) | 0.577 | 61.5 |
| van Biljon 2018 | -1.53 (-4.51 to 1.45) | 0.314 | 70.1 |
| Morrissey 2018 | -2.04 (-4.85 to 0.77) | 0.154 | 66.2 |
| Cvetković 2018 | -1.40 (-4.18 to 1.38) | 0.325 | 70.0 |

Table S9. Sensitivity analysis of high-intensity interval training versus moderate-intensity continuous training on diastolic blood pressure

| Excluding studies | WMD and 95% CI | P value | I2(%) |
| --- | --- | --- | --- |
| Corte de Araujo 2012 | 0.54 (-0.63 to 1.70) | 0.365 | 0.0 |
| Koubaa 2013 | 0.41 (-0.89 to 1.72) | 0.535 | 0.0 |
| Boer 2014 | 0.44 (-0.70 to 1.59) | 0.449 | 0.0 |
| Kargarfard 2016 | 0.78 (-0.46 to 2.02) | 0.217 | 0.0 |
| Kargarfard 2016 | 0.73 (-0.50 to 1.95) | 0.244 | 0.0 |
| van Biljon 2018 | 0.83 (-0.38 to 2.04) | 0.181 | 0.0 |
| Morrissey 2018 | 0.35 (-0.84 to 1.53) | 0.567 | 0.0 |
| Cvetković 2018 | 0.50 (-0.65 to 1.65) | 0.391 | 0.0 |

Table S10. Sensitivity analysis of high-intensity interval training versus moderate-intensity continuous training on glycemia

| Excluding studies | WMD and 95% CI | P value | I2(%) |
| --- | --- | --- | --- |
| Corte de Araujo 2012 | -3.64 (-12.38 to 5.11) | 0.415 | 70.6 |
| Boer 2014 | -3.11 (-12.68 to 6.47) | 0.525 | 73.9 |
| Lee 2015 | -2.53 (-8.40 to 3.34) | 0.399 | 75.1 |
| Morrissey 2018 | 0.54 (-2.58 to 3.66) | 0.736 | 0.0 |

Table S11. Sensitivity analysis of high-intensity interval training versus moderate-intensity continuous training on insulinemia

| Excluding studies | WMD and 95% CI | P value | I2(%) |
| --- | --- | --- | --- |
| Corte de Araujo 2012 | -1.91 (-5.01 to 1.18) | 0.226 | 38.9 |
| Boer 2014 | -2.06 (-5.56 to 1.44) | 0.248 | 36.5 |
| Farah 2014 | -2.15 (-4.49 to 0.19) | 0.071 | 17.9 |
| Lee 2015 | -1.55 (-3.48 to 0.38) | 0.115 | 0.0 |
| van Biljon 2018 | -1.41 (-4.22 to 1.40) | 0.325 | 34.6 |
| Morrissey 2018 | -1.33 (-4.59 to 1.93) | 0.424 | 33.3 |

Table S12. Sensitivity analysis of high-intensity interval training versus moderate-intensity continuous training on total cholesterol

| Excluding studies | WMD and 95% CI | P value | I2(%) |
| --- | --- | --- | --- |
| Corte de Araujo 2012 | -6.88 (-13.83 to 0.06) | 0.052 | 0.0 |
| Koubaa 2013 | -8.78 (-18.85 to 1.29) | 0.087 | 0.0 |
| Boer 2014 | -5.82 (-12.90 to 1.26) | 0.107 | 0.0 |
| Dias 2018 | -4.04 (-11.27 to 3.19) | 0.273 | 0.0 |
| Morrissey 2018 | -6.75 (-13.67 to 0.17) | 0.056 | 0.0 |

Table S13. Sensitivity analysis of high-intensity interval training versus moderate-intensity continuous training on high density lipoprotein

| Excluding studies | WMD and 95% CI | P value | I2(%) |
| --- | --- | --- | --- |
| Corte de Araujo 2012 | 1.24 (-5.89 to 8.38) | 0.733 | 81.1 |
| Koubaa 2013 | 2.79 (-3.30 to 8.88) | 0.369 | 58.2 |
| Boer 2014 | -2.70 (-4.92 to -0.48) | 0.017 | 0.0 |
| Dias 2018 | 1.41 (-5.92 to 8.74) | 0.707 | 81.3 |

Table S14. Sensitivity analysis of high-intensity interval training versus moderate-intensity continuous training on low density lipoprotein

| Excluding studies | WMD and 95% CI | P value | I2(%) |
| --- | --- | --- | --- |
| Corte de Araujo 2012 | -4.32 (-13.82 to 5.19) | 0.373 | 51.2 |
| Koubaa 2013 | -5.53 (-17.82 to 6.76) | 0.378 | 39.4 |
| Boer 2014 | -3.63 (-14.52 to 7.27) | 0.514 | 54.6 |
| Dias 2018 | 0.07 (-4.44 to 4.58) | 0.976 | 0.0 |

Table S15. Sensitivity analysis of high-intensity interval training versus moderate-intensity continuous training on triglycerides

| Excluding studies | WMD and 95% CI | P value | I2(%) |
| --- | --- | --- | --- |
| Corte de Araujo 2012 | -5.70 (-13.93 to 2.52) | 0.174 | 0.0 |
| Koubaa 2013 | -9.34 (-21.26 to 2.58) | 0.125 | 0.0 |
| Boer 2014 | -5.03 (-13.19 to 3.13) | 0.227 | 0.0 |
| Dias 2018 | -6.36 (-14.66 to 1.94) | 0.133 | 0.0 |
| Morrissey 2018 | -5.46 (-13.80 to 2.89) | 0.200 | 0.0 |

Table S16. Sensitivity analysis of high-intensity interval training versus moderate-intensity continuous training on HOMA-IR

| Excluding studies | WMD and 95% CI | P value | I2(%) |
| --- | --- | --- | --- |
| Corte de Araujo 2012 | -0.33 (-0.67 to 0.02) | 0.062 | 0.0 |
| Boer 2014 | -0.31 (-0.70 to 0.07) | 0.112 | 0.0 |
| Farah 2014 | -0.33 (-0.70 to 0.03) | 0.072 | 0.0 |
| Dias 2018 | -0.39 (-0.79 to 0.02) | 0.060 | 0.0 |
| Morrissey 2018 | -0.19 (-0.57 to 0.19) | 0.332 | 0.0 |

Table S17. Sensitivity analysis of high-intensity interval training versus moderate-intensity continuous training on HbA1c

| Excluding studies | WMD and 95% CI | P value | I2(%) |
| --- | --- | --- | --- |
| Corte de Araujo 2012 | 0.18 (0.02 to 0.34) | 0.028 | 0.0 |
| Lee 2015 | 0.08 (-0.10 to 0.25) | 0.380 | 68.5 |
| Dias 2018 | 0.01 (-0.10 to 0.11) | 0.926 | 0.0 |

Table S18. Sensitivity analysis of high-intensity interval training versus moderate-intensity continuous training on leptinemia

| Excluding studies | WMD and 95% CI | P value | I2(%) |
| --- | --- | --- | --- |
| Corte de Araujo 2012 | -3.51 (-14.57 to 7.55) | 0.534 | 88.8 |
| Farah 2014 | 2.72 (-1.52 to 6.96) | 0.208 | 0.0 |
| Lee 2015 | -1.86 (-17.78 to 14.05) | 0.818 | 84.6 |
